# Supplementary material for: Hierarchical porous Fe3O4/Co3S4nanosheets as an efficient electrocatalyst for the oxygen evolution reaction
Source: Royal Society of Chemistry journal article supplement (doi:10.1039/c7ta02108a), 2017-01-01
Supplement: c7ta02108a1.pdf [file c7ta02108a1.pdf]

Electronic Supplementary Information

# Hierarchical Porous Fe<sub>3</sub>O<sub>4</sub>/Co<sub>3</sub>S<sub>4</sub> Nanosheets as Efficient Electrocatalysts for Oxygen Evolution Reaction

Jing Du<sup>a,b</sup>, Ting Zhang<sup>a</sup>, Jiale Xing<sup>a</sup>, and Cailing Xu<sup>a\*</sup>

<sup>a</sup>State Key Laboratory of Applied Organic Chemistry, Laboratory of Special Function Materials and Structure Design of the Ministry of Education, College of Chemistry and Chemical Engineering, Lanzhou University, Lanzhou 730000, China

<sup>b</sup>Key Laboratory of Advanced Energy Materials Chemistry (Ministry of Education), Nankai University, Tianjin 300071, China

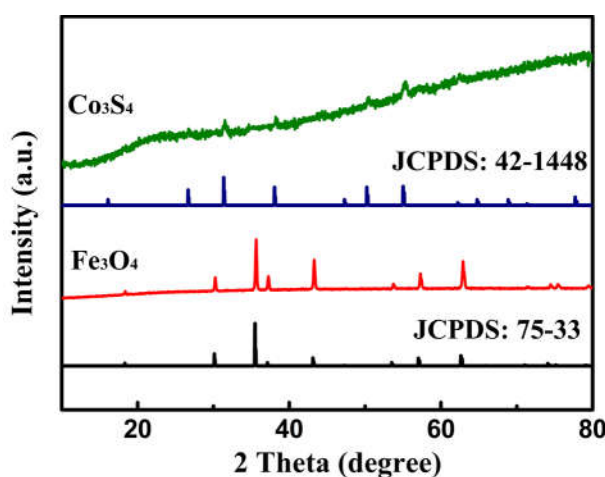

Fig. S1. XRD patterns of the prepared Fe<sub>3</sub>O<sub>4</sub> and Co<sub>3</sub>S<sub>4</sub> samples.

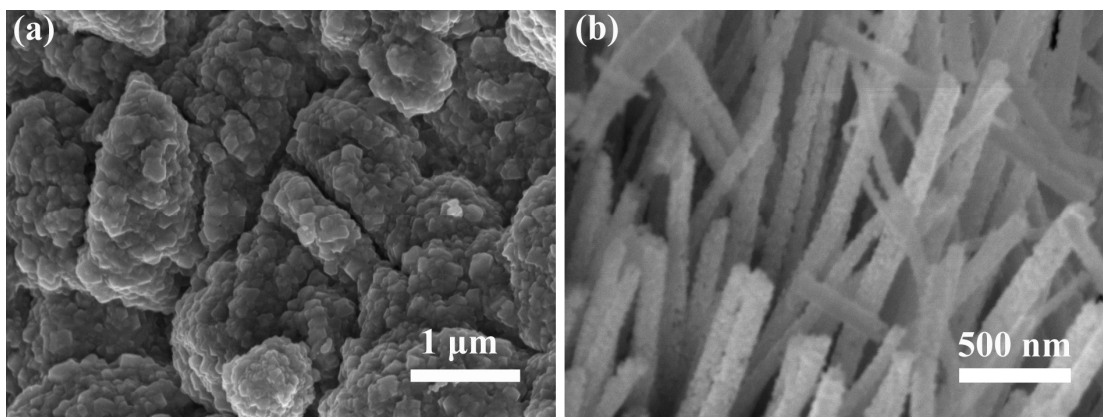

**Fig. S2.** SEM images of the prepared Fe<sub>3</sub>O<sub>4</sub> (a) and Co<sub>3</sub>S<sub>4</sub> (b) samples.

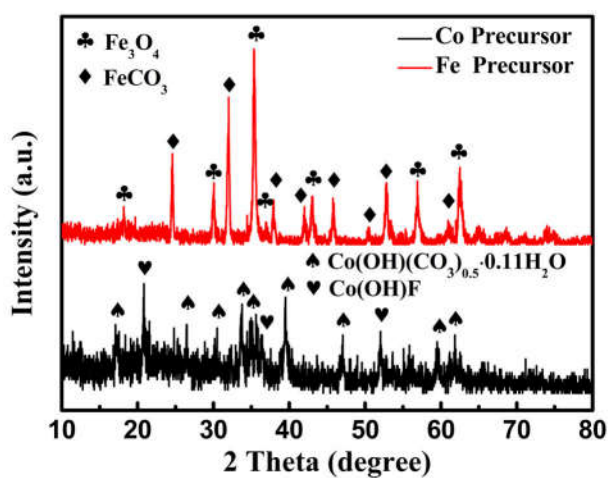

**Fig. S3.** XRD patterns of the iron and cobalt compound precursors. The diffraction peaks of cobalt compound precursor match well with the standard cards of Co(OH)F (JCPDS No. 50-0827) and Co(OH)(CO<sub>3</sub>)<sub>0.5</sub>·0.11H<sub>2</sub>O (JCPDS No. 48-0083). The diffraction peaks of iron compound precursor match well with the standard cards of Fe<sub>3</sub>O<sub>4</sub> (JCPDS No. 75-33) and FeCO<sub>3</sub> (JCPDS No. 29-696).

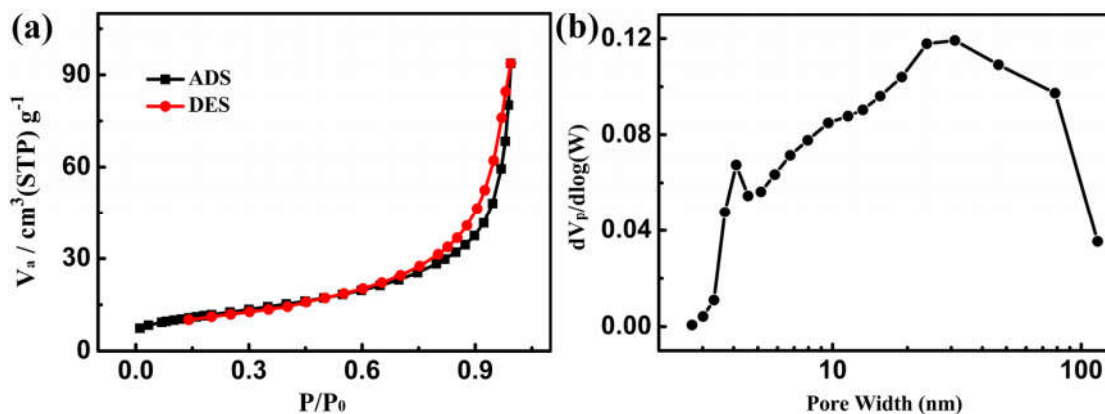

**Fig. S4.** (a) N<sub>2</sub> adsorption-desorption isotherms for porous Fe<sub>3</sub>O<sub>4</sub>/Co<sub>3</sub>S<sub>4</sub> nanosheets. (b) The characteristic BJH pore size distributions.

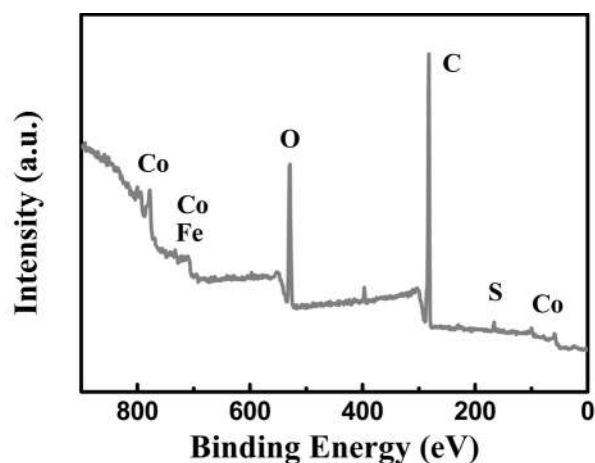

**Fig. S5.** XPS survey scan of hierarchical porous  $\text{Fe}_3\text{O}_4/\text{Co}_3\text{S}_4$  nanosheets.

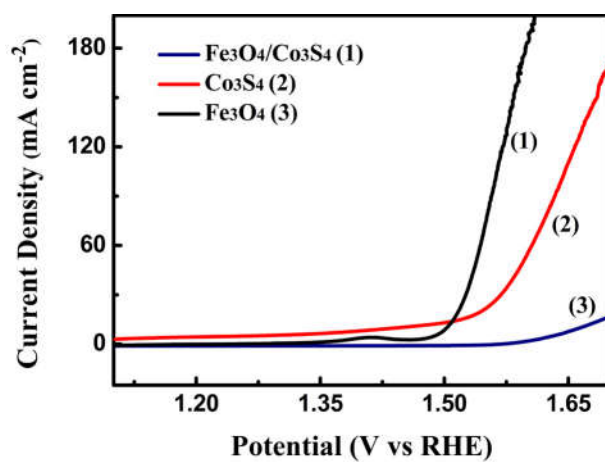

**Fig. S6.** Polarization curves of porous  $\text{Fe}_3\text{O}_4/\text{Co}_3\text{S}_4$  nanosheets,  $\text{Fe}_3\text{O}_4$  and  $\text{Co}_3\text{S}_4$  in 1.0 M KOH at a potential sweep rate of 5 mV/s.

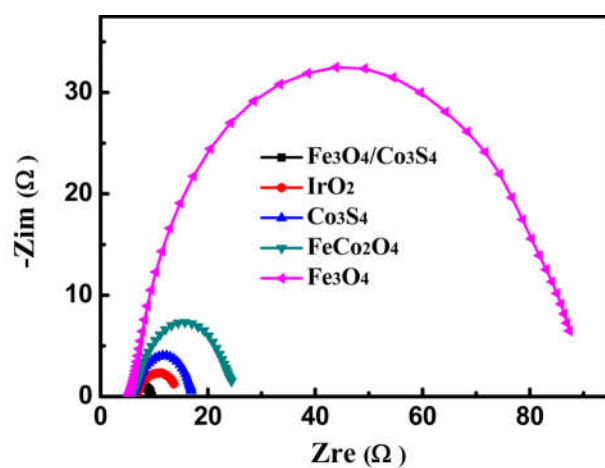

**Fig. S7.** Nyquist plots of porous  $\text{FeCo}_2\text{O}_4$ ,  $\text{Fe}_3\text{O}_4/\text{Co}_3\text{S}_4$  nanosheets,  $\text{IrO}_2$ ,  $\text{Fe}_3\text{O}_4$  and  $\text{Co}_3\text{S}_4$  samples.

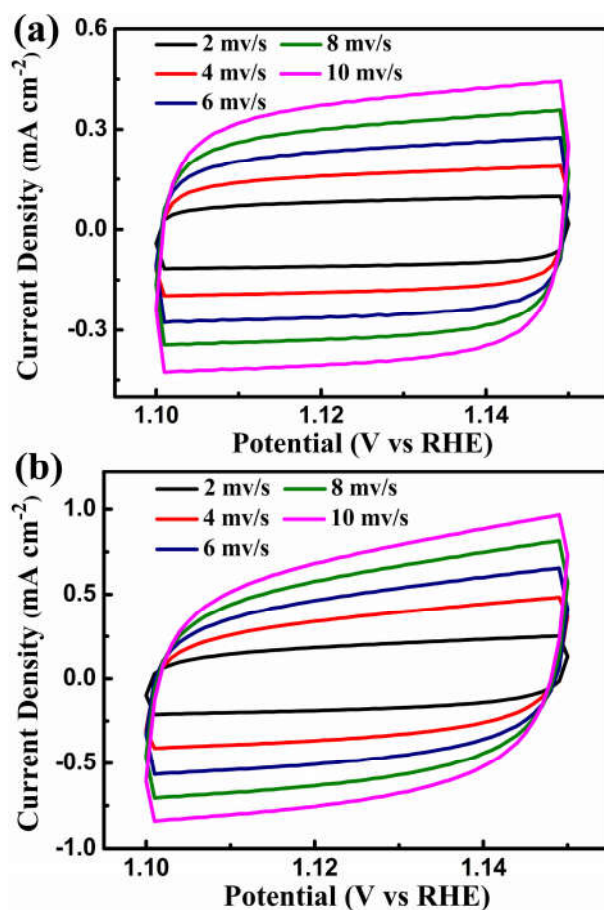

**Fig. S8.** Electrochemical double-layer capacitance measurements. The cyclic voltammograms (CVs) measurements with various scan rates for porous  $\text{FeCo}_2\text{O}_4$  (a) and  $\text{Fe}_3\text{O}_4/\text{Co}_3\text{S}_4$  (b) nanosheets in 1.0 M KOH.

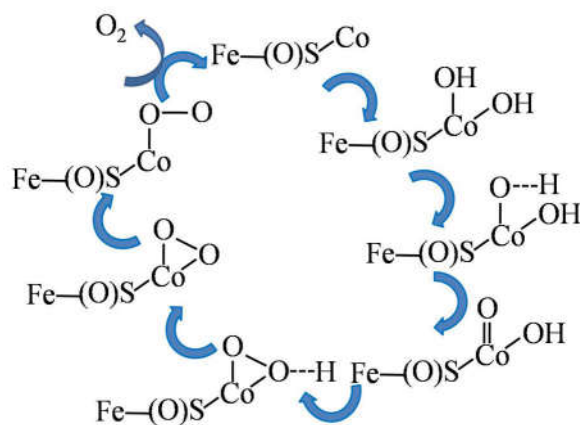

**Fig. S9.** The proposed OER reaction mechanism based on the  $\text{Fe}_3\text{O}_4/\text{Co}_3\text{S}_4$  sample.

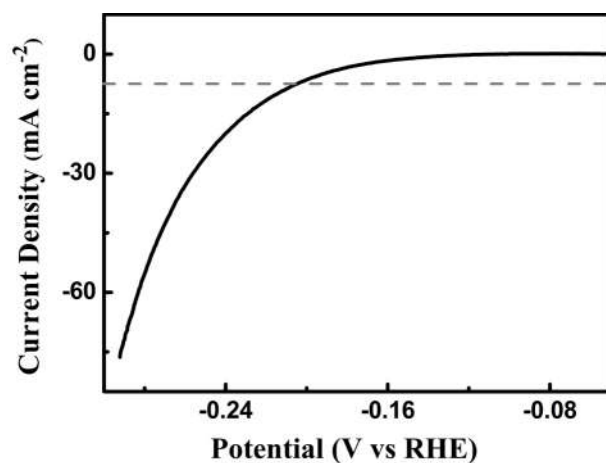

**Fig. S10.** Polarization curve of porous  $\text{Fe}_3\text{O}_4/\text{Co}_3\text{S}_4$  nanosheets in 1.0 M KOH at a potential sweep rate of 5 mV/s.

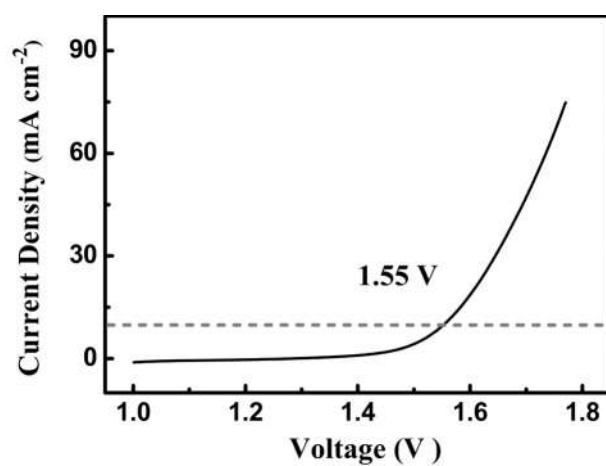

**Fig. S11.** Polarization curve of water electrolysis by using Pt/C-IrO<sub>2</sub> couple with a scan rate of 5 mV s<sup>-1</sup> in 1 M KOH.
